# Supplementary material
Source: publisher figshare collection journal article supplement (https://wiley.figshare.com/articles/dataset/_/3564603)
Supplement: Supplementary file 1 [file 1]

APPENDIX E.

TABLE E1. Comparisons of the initialized density (trees/ha) from LANDIS PRO at 0 simulation year against observed values from USDA Forest Service Inventory and Analysis (FIA) data for each ecological section in the CHFR using Chi-Square test ( $\alpha=0.05$ ).

| Species                   | Ozark Mountains |            | ILP-Transition Hills |            | ILP-Shawnee Hills |            | ILP-Highland Rim |            | ILP-Bluegrass |            | Central Till plains-Oak-hickory |            | Arkansas Valley |            |
|---------------------------|-----------------|------------|----------------------|------------|-------------------|------------|------------------|------------|---------------|------------|---------------------------------|------------|-----------------|------------|
|                           | FIA             | LANDIS PRO | FIA                  | LANDIS PRO | FIA               | LANDIS PRO | FIA              | LANDIS PRO | FIA           | LANDIS PRO | FIA                             | LANDIS PRO | FIA             | LANDIS PRO |
| White oak                 | 52.78           | 54.27      | 12.94                | 13.09      | 14.99             | 12.86      | 17.57            | 19.41      | 4.05          | 5.12       | 8.83                            | 9.46       | 11.4            | 27.99      |
| Chestnut oak              | 0.02            | 0.01       | 9.92                 | 5.60       | 2.50              | 3.74       | 7.59             | 8.39       | 0.84          | 1.84       | 0.05                            | 0.08       | 0.00            | 0.00       |
| Post oak                  | 40.59           | 40.9       | 1.38                 | 1.81       | 4.32              | 2.93       | 3.79             | 4.88       | 0.10          | 0.32       | 1.65                            | 1.83       | 59.00           | 59.53      |
| Northern red oak          | 10.56           | 11.10      | 4.51                 | 5.71       | 4.79              | 4.71       | 5.28             | 4.36       | 7.07          | 6.95       | 2.15                            | 2.89       | 3.43            | 10.14      |
| Black oak                 | 41.35           | 38.28      | 9.30                 | 8.93       | 14.03             | 10.2       | 4.11             | 5.75       | 3.22          | 3.56       | 5.20                            | 7.27       | 8.73            | 14.55      |
| Scarlet oak               | 6.12            | 6.87       | 1.33                 | 1.36       | 1.60              | 1.47       | 3.73             | 4.04       | 1.32          | 1.65       | 0.03                            | 0.09       | 0.00            | 0.00       |
| Southern red oak          | 3.12            | 2.97       | 0.41                 | 0.73       | 1.72              | 1.5        | 3.32             | 4.44       | 0.07          | 0.09       | 0.12                            | 0.10       | 9.28            | 9.06       |
| Red maple                 | 12.95           | 14.43      | 33.00                | 32.49      | 24.63             | 37.6       | 21.96            | 26.09      | 14.36         | 19.88      | 12.77                           | 13.1       | 12.55           | 22.68      |
| Sugar maple               | 13.82           | 15.01      | 76.39                | 81.99      | 64.19             | 66.52      | 61.10            | 47.54      | 46.57         | 55.35      | 24.00                           | 30.58      | 0.30            | 0.41       |
| Yellow poplar             | 0.41            | 0.45       | 47.44                | 38.17      | 26.91             | 28.29      | 36.99            | 34.4       | 8.47          | 11.66      | 2.88                            | 8.87       | 0.03            | 0.04       |
| American beech            | 0.55            | 0.62       | 36.26                | 33.20      | 17.02             | 22.66      | 17.83            | 13.98      | 6.23          | 10.22      | 2.60                            | 7.14       | 0.40            | 0.90       |
| Eastern hemlock           | --              | --         | --                   | --         | --                | --         | --               | --         | --            | --         | --                              | --         | --              | --         |
| Black cherry              | 8.55            | 8.56       | 10.30                | 10.99      | 11.92             | 10.68      | 11.81            | 11.12      | 9.78          | 10.72      | 20.08                           | 18.62      | 7.69            | 9.02       |
| White ash                 | 9.25            | 8.45       | 9.55                 | 15.09      | 13.33             | 11.33      | 10.92            | 11.62      | 29.68         | 29.29      | 13.64                           | 12.41      | 2.67            | 4.06       |
| Pignut hickory            | 5.39            | 5.19       | 8.85                 | 8.64       | 11.04             | 10.89      | 14.67            | 14.58      | 3.97          | 3.47       | 10.82                           | 12.88      | 0.34            | 0.6        |
| Mockernut hickory         | 23.53           | 23.98      | 2.27                 | 3.04       | 4.13              | 5.22       | 8.14             | 10.37      | 3.80          | 3.81       | 7.35                            | 3.73       | 20.33           | 22.57      |
| Shagbark hickory          | 5.16            | 7.16       | 3.10                 | 5.84       | 1.27              | 5.33       | 5.70             | 8.78       | 3.34          | 5.98       | 9.78                            | 14.29      | 0.86            | 1.03       |
| SweetGum                  | --              | --         | --                   | --         | --                | --         | --               | --         | --            | --         | --                              | --         | --              | --         |
| Shortleaf pine            | 13.31           | 14.03      | 0.32                 | 0.84       | 2.18              | 1.67       | 0.46             | 1.03       | 0.13          | 0.24       | 0.67                            | 1.22       | 41.92           | 54.62      |
| Loblolly pine             | 0.19            | 0.58       | 0.02                 | 0.03       | 1.66              | 3.45       | 8.10             | 10.07      | 0.00          | 0.00       | 0.01                            | 0.01       | 14.49           | 16.24      |
| Eastern white pine        | --              | --         | --                   | --         | --                | --         | --               | --         | --            | --         | --                              | --         | --              | --         |
| Red Cedar                 | 60.29           | 48.77      | 36.44                | 27.51      | 32.37             | 24.95      | 49.30            | 46.58      | 66.94         | 67.02      | 3.84                            | 3.63       | 66.25           | 56.83      |
| Red spruce                | --              | --         | --                   | --         | --                | --         | --               | --         | --            | --         | --                              | --         | --              | --         |
| Pseudo species            | 278.75          | 264.89     | 198.40               | 187.75     | 212.3             | 216.36     | 253.9            | 240.87     | 239.30        | 235.81     | 317.98                          | 265.71     | 224.53          | 243.70     |
| Chi-Square test ( $X^2$ ) | 5.69            |            | 9.20                 |            | 12.54             |            | 2.84             |            | 8.84          |            | 12.85                           |            | 9.79            |            |

| Species                      | Boston Mountains |            | Ouachita Mountains |            | Southern Unglaciaded Allegheny Plateau |            | Western Glaciaded Allegheny Plateau |            | Northern Ridge and Valleys |            | Allegheny Mountains |            | Northern Cumberland Mountains |            |
|------------------------------|------------------|------------|--------------------|------------|----------------------------------------|------------|-------------------------------------|------------|----------------------------|------------|---------------------|------------|-------------------------------|------------|
|                              | FIA              | LANDIS PRO | FIA                | LANDIS PRO | FIA                                    | LANDIS PRO | FIA                                 | LANDIS PRO | FIA                        | LANDIS PRO | FIA                 | LANDIS PRO | FIA                           | LANDIS PRO |
| White oak                    | 34.85            | 40.57      | 44.75              | 34.08      | 14.09                                  | 13.33      | 1.68                                | 2.81       | 16.40                      | 13.61      | 9.80                | 10.68      | 13.57                         | 13.13      |
| Chestnut oak                 | 0.04             | 0.06       | 0.00               | 0.00       | 7.85                                   | 10.52      | 0.37                                | 1.17       | 42.92                      | 38.57      | 13.39               | 22.11      | 19.80                         | 22.45      |
| Post oak                     | 31.26            | 36.88      | 73.56              | 68.97      | --                                     | --         | --                                  | --         | --                         | --         | --                  | --         | --                            | --         |
| Northern red oak             | 18.70            | 16.65      | 13.54              | 13.02      | 10.16                                  | 11.37      | 12.33                               | 9.64       | 17.27                      | 16.55      | 17.89               | 18.41      | 9.74                          | 9.65       |
| Black oak                    | 15.49            | 26.30      | 10.88              | 8.91       | 8.010                                  | 8.37       | 1.81                                | 2.28       | 10.59                      | 8.21       | 4.58                | 6.97       | 8.36                          | 8.61       |
| Scarlet oak                  | 0.20             | 0.37       | 0.00               | 0.00       | 2.59                                   | 3.33       | 0.52                                | 0.71       | 9.70                       | 9.89       | 4.42                | 6.69       | 7.23                          | 6.88       |
| Southern red oak             | 5.14             | 9.20       | 8.72               | 7.72       | --                                     | --         | --                                  | --         | --                         | --         | --                  | --         | --                            | --         |
| Red maple                    | 29.03            | 22.95      | 34.38              | 29.86      | 74.57                                  | 83.10      | 96.10                               | 91.96      | 84.15                      | 86.65      | 88.73               | 85.42      | 105.94                        | 91.83      |
| Sugar maple                  | 2.07             | 3.89       | 0.03               | 0.03       | 48.20                                  | 42.58      | 60.92                               | 58.99      | 19.19                      | 23.48      | 53.91               | 47.4       | 64.00                         | 50.81      |
| Yellow poplar                | 0.20             | 0.27       | 0.00               | 0.00       | 23.35                                  | 21.65      | 8.95                                | 7.34       | 11.32                      | 13.02      | 14.91               | 13.94      | 55.53                         | 38.11      |
| American beech               | 4.27             | 2.37       | 0.29               | 0.43       | 19.65                                  | 17.75      | 19.94                               | 16.41      | 4.53                       | 10.99      | 45.83               | 30.14      | 48.51                         | 32.62      |
| Eastern hemlock              | --               | --         | --                 | --         | 3.36                                   | 6.35       | 9.97                                | 11.13      | 12.32                      | 13.13      | 10.88               | 10.04      | 19.62                         | 11.71      |
| Black cherry                 | 12.56            | 10.06      | 11.79              | 10.3       | 29.88                                  | 27.50      | 44.79                               | 46.1       | 15.69                      | 13.98      | 36.37               | 31.17      | 7.74                          | 8.82       |
| White ash                    | 7.28             | 7.64       | 4.25               | 2.76       | 17.30                                  | 14.30      | 23.62                               | 19.3       | 12.52                      | 10.97      | 10.43               | 10.73      | 8.42                          | 7.98       |
| Pignut hickory               | 0.59             | 1.61       | 1.20               | 0.44       | 6.52                                   | 6.44       | 0.67                                | 0.88       | 11.12                      | 9.32       | 5.50                | 7.29       | 9.11                          | 8.11       |
| Mockernut hickory            | 22.64            | 26.25      | 38.49              | 28.68      | --                                     | --         | --                                  | --         | --                         | --         | --                  | --         | --                            | --         |
| Shagbark hickory             | 3.89             | 4.65       | 0.30               | 0.50       | --                                     | --         | --                                  | --         | --                         | --         | --                  | --         | --                            | --         |
| SweetGum                     | --               | --         | --                 | --         | --                                     | --         | --                                  | --         | --                         | --         | --                  | --         | --                            | --         |
| Shortleaf pine               | 24.12            | 23.14      | 110.47             | 97.88      | --                                     | --         | --                                  | --         | --                         | --         | --                  | --         | --                            | --         |
| Loblolly pine                | 5.04             | 3.90       | 85.08              | 36.49      | 1.70                                   | 0.58       | 0.01                                | 0.01       | 0.70                       | 0.64       | 0.10                | 0.22       | 0.06                          | 0.05       |
| Eastern white pine           | --               | --         | --                 | --         | 3.52                                   | 4.85       | 2.32                                | 2.32       | 19.84                      | 15.83      | 14.4                | 11.02      | 2.00                          | 5.72       |
| Red Cedar                    | 33.90            | 53.96      | 26.67              | 29.20      | 1.41                                   | 0.80       | 0.01                                | 0.01       | 5.03                       | 4.48       | 0.50                | 1.25       | 0.50                          | 1.20       |
| Red spruce                   | --               | --         | --                 | --         | 0.50                                   | 1.38       | 0.10                                | 0.16       | 1.00                       | 3.22       | 19.28               | 9.54       | 0.20                          | 0.57       |
| Pseudo species               | 271.64           | 282.04     | 275.05             | 220.28     | 216.8                                  | 197.16     | 212.3                               | 172.92     | 225.5                      | 205.28     | 192.91              | 196.59     | 273                           | 242.67     |
| Chi-Square (X <sup>2</sup> ) | 6.84             |            | 1.96               |            | 4.96                                   |            | 7.61                                |            | 7.26                       |            | 5.14                |            | 9.42                          |            |
